# Supplementary material for: Cascade Immune Mechanisms of Protection against Mycobacterium tuberculosis (IMPAc-TB): study protocol for the Household Contact Study in the Western Cape, South Africa
Source: Springer Nature journal article supplement (doi:10.1186/s12879-022-07349-8), 2022-04-15
Supplement: MOESM1 [file 20315502]

## **CASCADE BRONCHOSCOPY SOURCE DOCUMENT:**

PID: \_\_\_\_\_

Confirmed SARS-CoV-2 negative on PCR within last 7 days? : Yes  No

### 1. **Medical history:**

| Any changes in Medical history/ Medication since screening visit? Yes <input type="checkbox"/> No <input type="checkbox"/> |                                                             |             |             |                                                             |
|----------------------------------------------------------------------------------------------------------------------------|-------------------------------------------------------------|-------------|-------------|-------------------------------------------------------------|
| If Yes: Details:                                                                                                           |                                                             |             |             |                                                             |
|                                                                                                                            |                                                             |             |             |                                                             |
|                                                                                                                            |                                                             |             |             |                                                             |
| <u>Current Medication:</u>                                                                                                 |                                                             |             |             |                                                             |
| Cardiovascular Disease risk Factors? Yes <input type="checkbox"/> No <input type="checkbox"/> If Yes, Specify and do ECG   |                                                             |             |             |                                                             |
|                                                                                                                            |                                                             |             |             |                                                             |
| <u>Smoking history:</u>                                                                                                    |                                                             |             |             |                                                             |
|                                                                                                                            |                                                             |             |             |                                                             |
| <u>Drug use history:</u>                                                                                                   |                                                             |             |             |                                                             |
|                                                                                                                            |                                                             |             |             |                                                             |
| <u>Surgical History:</u>                                                                                                   |                                                             |             |             |                                                             |
|                                                                                                                            |                                                             |             |             |                                                             |
| Prior Adverse reaction to local or general anaesthetic: (own or familial)                                                  |                                                             |             |             |                                                             |
|                                                                                                                            |                                                             |             |             |                                                             |
| <u>Allergies:</u>                                                                                                          |                                                             |             |             |                                                             |
|                                                                                                                            |                                                             |             |             |                                                             |
| Special investigation                                                                                                      | Done                                                        | Date        | Comment:    | Preclude safe procedure?                                    |
| SARS CoV-2 Serology                                                                                                        | <input type="checkbox"/> Yes<br><input type="checkbox"/> No | DD/MMM/20YY |             | <input type="checkbox"/> Yes<br><input type="checkbox"/> No |
| CXR                                                                                                                        | <input type="checkbox"/> Yes<br><input type="checkbox"/> No | DD/MMM/20YY |             | <input type="checkbox"/> Yes<br><input type="checkbox"/> No |
| ECG                                                                                                                        | <input type="checkbox"/> Yes<br><input type="checkbox"/> No | DD/MMM/20YY | Indication: | <input type="checkbox"/> Yes<br><input type="checkbox"/> No |
| Safety blood tests                                                                                                         | <input type="checkbox"/> Yes<br><input type="checkbox"/> No | DD/MMM/20YY |             | <input type="checkbox"/> Yes<br><input type="checkbox"/> No |
| PET/CT                                                                                                                     | <input type="checkbox"/> Yes<br><input type="checkbox"/> No | DD/MMM/20YY |             | <input type="checkbox"/> Yes<br><input type="checkbox"/> No |
| Other                                                                                                                      | <input type="checkbox"/> Yes<br><input type="checkbox"/> No | DD/MMM/20YY |             | <input type="checkbox"/> Yes<br><input type="checkbox"/> No |

|        |                                                                                                                                           |
|--------|-------------------------------------------------------------------------------------------------------------------------------------------|
| (Tick) | <b>Karnofsky score</b> (if <60, do not perform bronchoscopy)                                                                              |
|        | <b>100%</b> - normal, no complaints, no signs of disease.                                                                                 |
|        | <b>90%</b> - capable of normal activity, few symptoms or signs of disease.                                                                |
|        | <b>80%</b> - normal activity with some difficulty, some symptoms or signs.                                                                |
|        | <b>70%</b> - caring for self, not capable of normal activity or work.                                                                     |
|        | <b>60%</b> - requiring some help, can take care of most personal requirements.                                                            |
|        | <b>50%</b> - requires help often, requires frequent medical care.                                                                         |
|        | <b>40%</b> - disabled, requires special care and help. <b>30%</b> - severely disabled, hospital admission indicated but no risk of death. |
|        | <b>20%</b> - very ill, urgently requiring admission and supportive measures of treatment.                                                 |
|        | <b>10%</b> - moribund, rapidly progressive fatal disease.                                                                                 |

## 2. Examination:

|                                                                                                                                                                               |                                                                                         |
|-------------------------------------------------------------------------------------------------------------------------------------------------------------------------------|-----------------------------------------------------------------------------------------|
| <b>Baseline vitals:</b>                                                                                                                                                       |                                                                                         |
| BP: <input type="text"/> <input type="text"/> <input type="text"/> <input type="text"/> / <input type="text"/> <input type="text"/> <input type="text"/> <input type="text"/> | Saturation (room air): <input type="text"/> <input type="text"/> <input type="text"/> % |
| Pulse: <input type="text"/> <input type="text"/> <input type="text"/> /min                                                                                                    | Resp Rate: <input type="text"/> <input type="text"/> /min                               |
| Weight: <input type="text"/> <input type="text"/> <input type="text"/> , <input type="text"/> kg                                                                              |                                                                                         |

|                                       |                                                                                                                                                                                                                                                              |
|---------------------------------------|--------------------------------------------------------------------------------------------------------------------------------------------------------------------------------------------------------------------------------------------------------------|
| <b>Targeted physical examination:</b> |                                                                                                                                                                                                                                                              |
| Pertinent signs of disease            | <input type="checkbox"/> None<br><input type="checkbox"/> Clinically wasted<br><input type="checkbox"/> Pallor<br><input type="checkbox"/> Clubbing<br><input type="checkbox"/> Palpable lymphadenopathy<br><input type="checkbox"/> Other If other specify: |
| Positive findings on auscultation:    | <input type="checkbox"/> Yes <input type="checkbox"/> No<br>If yes, specify:                                                                                                                                                                                 |
| Other Resp findings                   | <input type="checkbox"/> Yes <input type="checkbox"/> No<br>If yes, specify:                                                                                                                                                                                 |
| Cardiovascular                        | <input type="checkbox"/> Normal <input type="checkbox"/> Abnormal<br>If Abnormal, specify:                                                                                                                                                                   |
| Mouth Opening                         |                                                                                                                                                                                                                                                              |

|                        |               |
|------------------------|---------------|
| Teeth                  |               |
| Mallampati (circle)    | 1 2 3 4       |
| Neck – range of motion |               |
| ASA rating: (circle)   | I II III IV E |

Print name: \_\_\_\_\_ Signature: \_\_\_\_\_ Date: DD/MMM/20YY

Designation (circle correct) Study staff /TBH staff

### 3. Bronchoscopy:

|                                                                    |                                                                                       |
|--------------------------------------------------------------------|---------------------------------------------------------------------------------------|
| Consent signed in ICF,<br>Understanding confirmed                  | <input type="checkbox"/> Yes <input type="checkbox"/> No N/A <input type="checkbox"/> |
| Fasting >6hours solids and opaque<br>fluids; >4 hours clear fluids | <input type="checkbox"/> Yes <input type="checkbox"/> No                              |

|                                                                                |
|--------------------------------------------------------------------------------|
| <b>Inhalation:</b> (circle) O <sub>2</sub> Flow Rate: ____l/min Air Other      |
| <b>Fluid :</b>                                                                 |
| Site of IV line: Type of IV Fluid:                                             |
| Total volume fluids given: _____ml IV cannula size: (circle) : 24G 22G 20G 18G |
| <b>Monitors:</b> (circle) ECG Pulse oximeter NIBP Other                        |
| <b>Ventilation:</b> (circle) Spontaneous Manual                                |

|                |  |  |  |  |  |  |  |  |  |  |  |  |  |  |  |  |  |  |  |  |
|----------------|--|--|--|--|--|--|--|--|--|--|--|--|--|--|--|--|--|--|--|--|
| <b>Time</b>    |  |  |  |  |  |  |  |  |  |  |  |  |  |  |  |  |  |  |  |  |
| 220            |  |  |  |  |  |  |  |  |  |  |  |  |  |  |  |  |  |  |  |  |
| 200            |  |  |  |  |  |  |  |  |  |  |  |  |  |  |  |  |  |  |  |  |
| 180            |  |  |  |  |  |  |  |  |  |  |  |  |  |  |  |  |  |  |  |  |
| 170            |  |  |  |  |  |  |  |  |  |  |  |  |  |  |  |  |  |  |  |  |
| 160            |  |  |  |  |  |  |  |  |  |  |  |  |  |  |  |  |  |  |  |  |
| 150            |  |  |  |  |  |  |  |  |  |  |  |  |  |  |  |  |  |  |  |  |
| 140            |  |  |  |  |  |  |  |  |  |  |  |  |  |  |  |  |  |  |  |  |
| 130            |  |  |  |  |  |  |  |  |  |  |  |  |  |  |  |  |  |  |  |  |
| 120            |  |  |  |  |  |  |  |  |  |  |  |  |  |  |  |  |  |  |  |  |
| 110            |  |  |  |  |  |  |  |  |  |  |  |  |  |  |  |  |  |  |  |  |
| 100            |  |  |  |  |  |  |  |  |  |  |  |  |  |  |  |  |  |  |  |  |
| 90             |  |  |  |  |  |  |  |  |  |  |  |  |  |  |  |  |  |  |  |  |
| 80             |  |  |  |  |  |  |  |  |  |  |  |  |  |  |  |  |  |  |  |  |
| 70             |  |  |  |  |  |  |  |  |  |  |  |  |  |  |  |  |  |  |  |  |
| 60             |  |  |  |  |  |  |  |  |  |  |  |  |  |  |  |  |  |  |  |  |
| 50             |  |  |  |  |  |  |  |  |  |  |  |  |  |  |  |  |  |  |  |  |
| 40             |  |  |  |  |  |  |  |  |  |  |  |  |  |  |  |  |  |  |  |  |
| 30             |  |  |  |  |  |  |  |  |  |  |  |  |  |  |  |  |  |  |  |  |
| 20             |  |  |  |  |  |  |  |  |  |  |  |  |  |  |  |  |  |  |  |  |
| 10             |  |  |  |  |  |  |  |  |  |  |  |  |  |  |  |  |  |  |  |  |
| SpO2           |  |  |  |  |  |  |  |  |  |  |  |  |  |  |  |  |  |  |  |  |
| FiO2           |  |  |  |  |  |  |  |  |  |  |  |  |  |  |  |  |  |  |  |  |
| Sedation Level |  |  |  |  |  |  |  |  |  |  |  |  |  |  |  |  |  |  |  |  |

| <b>University of Michigan Sedation Scale</b> |                                                                                                      |
|----------------------------------------------|------------------------------------------------------------------------------------------------------|
| 0                                            | Awake and Alert                                                                                      |
| 1                                            | Minimally sedated – Patient drowsy and sleepy but rousable to verbal command                         |
| 2                                            | Moderately sedated – Patient may be sleeping, but can easily be aroused by light tactile stimulation |
| 3                                            | Deeply sedated – only rousable by significant physical stimulation/ repeated painful stimuli         |
| 4                                            | Patient asleep – only rousable by significant physical stimulation/repeated painful stimuli          |
| 5                                            | Not rousable – no response with significant physical stimulation                                     |

|                                |                                                                          |
|--------------------------------|--------------------------------------------------------------------------|
| Was bronchoscopy performed?    | <input type="checkbox"/> Yes <input type="checkbox"/> No If no, specify: |
| Date of bronchoscopy:          | <u>DD/MMM/20YY</u>                                                       |
| Bronchoscopy nurse:            |                                                                          |
| Bronchoscopist:                |                                                                          |
| Sedationist:                   |                                                                          |
| Bronchoscopy Theatre: (Circle) | BMRI                      A5:TBH                                         |

|                                                                                                                                                                                                                                                                                                                                |                                                                                                                            |       |                                             |                       |
|--------------------------------------------------------------------------------------------------------------------------------------------------------------------------------------------------------------------------------------------------------------------------------------------------------------------------------|----------------------------------------------------------------------------------------------------------------------------|-------|---------------------------------------------|-----------------------|
| Start time of sedation: __:__                                                                                                                                                                                                                                                                                                  | Start time of procedure: __:__                                                                                             |       |                                             |                       |
| Duration of procedure (min)                                                                                                                                                                                                                                                                                                    |                                                                                                                            |       |                                             |                       |
| Access route                                                                                                                                                                                                                                                                                                                   | <input type="checkbox"/> Right nostril <input type="checkbox"/> Left Nostril <input type="checkbox"/> Mouth<br>Comment:    |       |                                             |                       |
| Local Lignocaine                                                                                                                                                                                                                                                                                                               | <input type="checkbox"/> Yes <input type="checkbox"/> No                                                                   |       |                                             |                       |
| Lignocaine gel in Nostrils                                                                                                                                                                                                                                                                                                     | <input type="checkbox"/> Yes <input type="checkbox"/> No    Right: <input type="checkbox"/> Left: <input type="checkbox"/> |       |                                             |                       |
| Lignocaine spray in throat (mg)                                                                                                                                                                                                                                                                                                |                                                                                                                            |       |                                             |                       |
| Lignocaine cords/trachea (mg)                                                                                                                                                                                                                                                                                                  |                                                                                                                            |       |                                             |                       |
| Lignocaine total (mg)                                                                                                                                                                                                                                                                                                          |                                                                                                                            |       |                                             |                       |
| *Remicaine gel 2% (2g/100g), 1 gram of gel is 20mg of lignocaine, ** Xylocaine 10mg/metered dose (or 0.1ml) delivers 10mg lignocaine per spray. ***Each dose of lignocaine delivered through the bronchoscope working channel is 20mg (2ml of 1% lignocaine, 10mg/ml) Maximum safe dose = 4.5mg/kg (or 300mg for a 65kg adult) |                                                                                                                            |       |                                             |                       |
| Systemic sedative administered? <input type="checkbox"/> Yes <input type="checkbox"/> No                                                                                                                                                                                                                                       | Dosage for weight = _____ kg                                                                                               |       |                                             |                       |
| Drug:                                                                                                                                                                                                                                                                                                                          | Total Dose:                                                                                                                | Route | Recommended for bolus                       |                       |
| Propofol <input type="checkbox"/> Yes <input type="checkbox"/> No                                                                                                                                                                                                                                                              |                                                                                                                            |       | 0,5 mg/kg<br>over 3-5 minutes<br>= _____ mg |                       |
| Fentanyl <input type="checkbox"/> Yes <input type="checkbox"/> No                                                                                                                                                                                                                                                              |                                                                                                                            |       | 0,25 µg/kg<br>= _____ µg                    | 2 µg/kg<br>= _____ µg |
| Midazolam <input type="checkbox"/> Yes <input type="checkbox"/> No                                                                                                                                                                                                                                                             |                                                                                                                            |       | 0.05-0.1 mg/kg<br>[max 2 mg]<br>= _____ mg  | 3mg                   |
| Any other medication? <input type="checkbox"/> Yes <input type="checkbox"/> No                                                                                                                                                                                                                                                 |                                                                                                                            |       |                                             |                       |
| Details:                                                                                                                                                                                                                                                                                                                       |                                                                                                                            |       |                                             |                       |

**Bronchoscopy findings:**

|                          | Observations (circle)                             | Comment if abnormal            |
|--------------------------|---------------------------------------------------|--------------------------------|
| Cords                    | Normal/Abnormal                                   |                                |
| Mucosa                   | Normal/Abnormal                                   |                                |
| Secretions               | None/some/copious<br>Clear/opaque/purulent/bloody | Arising from specific segment? |
| Bronchial Anatomy        | Normal/variant of normal/abnormal                 |                                |
| BAL fluid                | Clear/bloody/milky/black                          |                                |
| Other important findings |                                                   |                                |

|                                                                                            |                                                                                                                                                                                      |
|--------------------------------------------------------------------------------------------|--------------------------------------------------------------------------------------------------------------------------------------------------------------------------------------|
| Lung Lobe used                                                                             | <input type="checkbox"/> RUL <input type="checkbox"/> RLL <input type="checkbox"/> RML<br><input type="checkbox"/> LUL <input type="checkbox"/> LLL <input type="checkbox"/> Lingula |
| Complications                                                                              | <input type="checkbox"/> Yes <input type="checkbox"/> No<br>If yes, was it serious? <input type="checkbox"/> Yes <input type="checkbox"/> No<br>Comment:                             |
| Volume in (ml)                                                                             |                                                                                                                                                                                      |
| BAL fluid out (ml)                                                                         |                                                                                                                                                                                      |
| Other procedures (eg bronchial brush/ Biopsy?)                                             | <input type="checkbox"/> Yes <input type="checkbox"/> No<br>Comment:                                                                                                                 |
| Ultrasound performed after procedure?                                                      | <input type="checkbox"/> Yes <input type="checkbox"/> No<br>Comment:                                                                                                                 |
| BAL sample ( $\pm$ 150 ml) transported to lab <b>on ice</b><br>Time in cooler box: ___:___ | <input type="checkbox"/> Yes <input type="checkbox"/> No<br>Comment:                                                                                                                 |

Print name

Signature

DD/MMM/20YY

Designation

**POST-PROCEDURAL ASSESSMENT:**

|                                                                                                    | Yes | No | Comment |
|----------------------------------------------------------------------------------------------------|-----|----|---------|
| Are the blood pressure and heart rate stable/within pre-bronchoscopy range?                        |     |    |         |
| Can the patient swallow and cough?                                                                 |     |    |         |
| Can the patient walk without feeling dizzy or faint?                                               |     |    |         |
| No nausea or vomiting.                                                                             |     |    |         |
| Is the patient breathing comfortably and of normal color?                                          |     |    |         |
| Is the patient awake and behaving appropriately?                                                   |     |    |         |
| No active bleeding from nose or mouth.                                                             |     |    |         |
| Have verbal postoperative instructions been given and explained to both the patient and caretaker? |     |    |         |
| Is the patient pain free?                                                                          |     |    |         |
| Have possible complications been explained?                                                        |     |    |         |
| Will the patient be transported home by study staff?                                               |     |    |         |
| TB Positive participant referred to CHC and provided with referral letter and copies of reports?   |     |    |         |
| Any other complaints?                                                                              |     |    |         |
| Copy of discharge summary given to participant?                                                    |     |    |         |

Signature: \_\_\_\_\_

Date: DD/MMM/20YY

Time: \_\_\_\_\_

Designation: Study Clinician

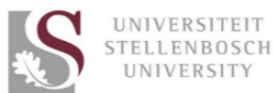

Division Molecular Biology and Human Genetics  
Clinical Standard Operating Procedures

## **Post Bronchoscopy Discharge Summary**

***(Please supply participant with a copy to take home)***

The below participant underwent a bronchoscopy with broncho-alveolar lavage for research purposes at the University of Stellenbosch, Bio-medical Research Unit

Referral site: \_\_\_\_\_ Study name: \_\_\_\_\_

PID: \_\_\_\_\_ Date of procedure: dd / mmm / 20yy

Lung lobe(s) used for lavage\*: \_\_\_\_\_ Other procedures performed: \_\_\_\_\_

*\*Residual fluid in this part of the lung will be visible on chest radiograph for up to 24 hours after the procedure*

Sedation used during procedure: Propofol / Midazolam / Fentanyl / Other \_\_\_\_\_

Lignocaine spray used: \_\_\_\_\_

Vital signs on discharge: HR: \_\_\_\_/min RR: \_\_\_\_/min BP: \_\_\_\_/\_\_\_\_ Sats: \_\_\_\_\_%

Any complications: \_\_\_\_\_

\_\_\_\_\_

Any abnormalities noted: \_\_\_\_\_

*Possible minor adverse events from this procedure include discomfort of the nose and throat,*

*coughing, low grade fever, minor epistaxis, chest pain or speckled haemoptysis.*

*Please contact the number below if symptoms are severe, the patient has dyspnoea, or symptoms*

*persist for > 24 hours.*

**In case of emergency contact:**

Name: \_\_\_\_\_ Contact number: \_\_\_\_\_

Facility: \_\_\_\_\_

Assessed by: \_\_\_\_\_ Signature: \_\_\_\_\_

Date: dd / mmm / 20yy Time: \_\_\_\_h\_\_\_\_
