# Supplementary material for: Cascade Immune Mechanisms of Protection against Mycobacterium tuberculosis (IMPAc-TB): study protocol for the Household Contact Study in the Western Cape, South Africa
Source: Springer Nature journal article supplement (doi:10.1186/s12879-022-07349-8), 2022-04-15
Supplement: MOESM3 [file 20315502]

| Variable                                              | REDCap Type | SQL Type | Enumeration    | CUI                          | CUI Name                                                                 |
|-------------------------------------------------------|-------------|----------|----------------|------------------------------|--------------------------------------------------------------------------|
| <b>Distinct Identifier</b>                            |             |          |                |                              |                                                                          |
| Record ID                                             | text        | CHAR     | NA             | C0681857                     | individual as study subject                                              |
| <b>Physical At Enrollment</b>                         |             |          |                |                              |                                                                          |
| TB treatment started?                                 | yesno       | BOOLEAN  | NA             | C0041296; C0013216; C1272689 | Tuberculosis; Pharmacotherapy; Started                                   |
| If yes, date started                                  | text        | DATE     | NA             | C1531783                     | Date treatment started                                                   |
| Lung disease (excl. TB)                               | radio       | BOOLEAN  | 1, Yes   0, No | C0024115                     | Lung diseases                                                            |
| Diabetes                                              | radio       | BOOLEAN  | 1, Yes   0, No | C0011849                     | Diabetes Mellitus                                                        |
| Hypertension                                          | radio       | BOOLEAN  | 1, Yes   0, No | C0020538                     | Hypertensive disease                                                     |
| Heart disease                                         | radio       | BOOLEAN  | 1, Yes   0, No | C0018799                     | Heart Diseases                                                           |
| Kidney disease                                        | radio       | BOOLEAN  | 1, Yes   0, No | C0022658                     | Kidney Diseases                                                          |
| Thyroid disease                                       | radio       | BOOLEAN  | 1, Yes   0, No | C0040128                     | Thyroid Diseases                                                         |
| Cancer                                                | radio       | BOOLEAN  | 1, Yes   0, No | CL604836                     | Cancer (e.g., lung, breast, genitourinary, colon, etc. in some patients) |
| Psychiatric disorders                                 | radio       | BOOLEAN  | 1, Yes   0, No | C1718246                     | Psychiatric or mood diseases or conditions                               |
| Hepatitis B                                           | radio       | BOOLEAN  | 1, Yes   0, No | C0019163                     | Hepatitis B                                                              |
| Hepatitis C                                           | radio       | BOOLEAN  | 1, Yes   0, No | C0019196                     | Hepatitis C                                                              |
| Other liver diseases                                  | radio       | BOOLEAN  | 1, Yes   0, No | C0023895                     | Liver diseases                                                           |
| Asthma                                                | radio       | BOOLEAN  | 1, Yes   0, No | C0004096                     | Asthma                                                                   |
| Gout                                                  | radio       | BOOLEAN  | 1, Yes   0, No | C0018099                     | Gout                                                                     |
| Arthritis                                             | radio       | BOOLEAN  | 1, Yes   0, No | C0003864                     | Arthritis                                                                |
| Alcoholism/Excessive alcohol use                      | radio       | BOOLEAN  | 1, Yes   0, No | C0455500                     | H/O: alcoholism                                                          |
| If yes other lung disease, please provide ICD10 code: | text        | VARCHAR  | ICD10          | CL936147                     | ICD10, 2016                                                              |
| If yes other lung disease, please provide ICD10 code: | text        | VARCHAR  | ICD10          | CL936147                     | ICD10, 2016                                                              |
| If yes other lung disease, please provide ICD10 code: | text        | VARCHAR  | ICD10          | CL936147                     | ICD10, 2016                                                              |
| If yes diabetes, please provide ICD10 code:           | text        | VARCHAR  | ICD10          | CL936147                     | ICD10, 2016                                                              |
| If yes diabetes, please provide ICD10 code:           | text        | VARCHAR  | ICD10          | CL936147                     | ICD10, 2016                                                              |
| If yes diabetes, please provide ICD10 code:           | text        | VARCHAR  | ICD10          | CL936147                     | ICD10, 2016                                                              |
| If yes hypertension, please provide ICD10 code:       | text        | VARCHAR  | ICD10          | CL936147                     | ICD10, 2016                                                              |
| If yes hypertension, please provide ICD10 code:       | text        | VARCHAR  | ICD10          | CL936147                     | ICD10, 2016                                                              |
| If yes hypertension, please provide ICD10 code:       | text        | VARCHAR  | ICD10          | CL936147                     | ICD10, 2016                                                              |

| Variable                                                | REDCap Type | SQL Type | Enumeration | CUI      | CUI Name    |
|---------------------------------------------------------|-------------|----------|-------------|----------|-------------|
| If yes heart disease, please provide ICD10 code:        | text        | VARCHAR  | ICD10       | CL936147 | ICD10, 2016 |
| If yes heart disease, please provide ICD10 code:        | text        | VARCHAR  | ICD10       | CL936147 | ICD10, 2016 |
| If yes heart disease, please provide ICD10 code:        | text        | VARCHAR  | ICD10       | CL936147 | ICD10, 2016 |
| If yes kidney disease, please provide ICD10 code:       | text        | VARCHAR  | ICD10       | CL936147 | ICD10, 2016 |
| If yes kidney disease, please provide ICD10 code:       | text        | VARCHAR  | ICD10       | CL936147 | ICD10, 2016 |
| If yes kidney disease, please provide ICD10 code:       | text        | VARCHAR  | ICD10       | CL936147 | ICD10, 2016 |
| If yes thyroid disease, please provide ICD10 code:      | text        | VARCHAR  | ICD10       | CL936147 | ICD10, 2016 |
| If yes thyroid disease, please provide ICD10 code:      | text        | VARCHAR  | ICD10       | CL936147 | ICD10, 2016 |
| If yes thyroid disease, please provide ICD10 code:      | text        | VARCHAR  | ICD10       | CL936147 | ICD10, 2016 |
| If yes cancer, please provide ICD10 code:               | text        | VARCHAR  | ICD10       | CL936147 | ICD10, 2016 |
| If yes cancer, please provide ICD10 code:               | text        | VARCHAR  | ICD10       | CL936147 | ICD10, 2016 |
| If yes cancer, please provide ICD10 code:               | text        | VARCHAR  | ICD10       | CL936147 | ICD10, 2016 |
| If yes psychiatric disorder, please provide ICD10 code: | text        | VARCHAR  | ICD10       | CL936147 | ICD10, 2016 |
| If yes psychiatric disorder, please provide ICD10 code: | text        | VARCHAR  | ICD10       | CL936147 | ICD10, 2016 |
| If yes psychiatric disorder, please provide ICD10 code: | text        | VARCHAR  | ICD10       | CL936147 | ICD10, 2016 |
| If yes Hep B, please provide ICD10 code:                | text        | VARCHAR  | ICD10       | CL936147 | ICD10, 2016 |
| If yes Hep B, please provide ICD10 code:                | text        | VARCHAR  | ICD10       | CL936147 | ICD10, 2016 |
| If yes Hep B, please provide ICD10 code:                | text        | VARCHAR  | ICD10       | CL936147 | ICD10, 2016 |
| If yes Hep C, please provide ICD10 code:                | text        | VARCHAR  | ICD10       | CL936147 | ICD10, 2016 |
| If yes Hep C, please provide ICD10 code:                | text        | VARCHAR  | ICD10       | CL936147 | ICD10, 2016 |
| If yes Hep C, please provide ICD10 code:                | text        | VARCHAR  | ICD10       | CL936147 | ICD10, 2016 |
| If yes other liver disease, please provide ICD10 code:  | text        | VARCHAR  | ICD10       | CL936147 | ICD10, 2016 |
| If yes other liver disease, please provide ICD10 code:  | text        | VARCHAR  | ICD10       | CL936147 | ICD10, 2016 |
| If yes other liver disease, please provide ICD10 code:  | text        | VARCHAR  | ICD10       | CL936147 | ICD10, 2016 |
| If yes asthma, please provide ICD10 code:               | text        | VARCHAR  | ICD10       | CL936147 | ICD10, 2016 |

| Variable                                                                | REDCap Type | SQL Type  | Enumeration                                                                                      | CUI                          | CUI Name                                                  |
|-------------------------------------------------------------------------|-------------|-----------|--------------------------------------------------------------------------------------------------|------------------------------|-----------------------------------------------------------|
| If yes asthma, please provide ICD10 code:                               | text        | VARCHAR   | ICD10                                                                                            | CL936147                     | ICD10, 2016                                               |
| If yes asthma, please provide ICD10 code:                               | text        | VARCHAR   | ICD10                                                                                            | CL936147                     | ICD10, 2016                                               |
| If yes gout, please provide ICD10 code:                                 | text        | VARCHAR   | ICD10                                                                                            | CL936147                     | ICD10, 2016                                               |
| If yes gout, please provide ICD10 code:                                 | text        | VARCHAR   | ICD10                                                                                            | CL936147                     | ICD10, 2016                                               |
| If yes gout, please provide ICD10 code:                                 | text        | VARCHAR   | ICD10                                                                                            | CL936147                     | ICD10, 2016                                               |
| If yes arthritis, please provide ICD10 code:                            | text        | VARCHAR   | ICD10                                                                                            | CL936147                     | ICD10, 2016                                               |
| If yes arthritis, please provide ICD10 code:                            | text        | VARCHAR   | ICD10                                                                                            | CL936147                     | ICD10, 2016                                               |
| If yes arthritis, please provide ICD10 code:                            | text        | VARCHAR   | ICD10                                                                                            | CL936147                     | ICD10, 2016                                               |
| If yes alcoholism, please provide ICD10 code:                           | text        | VARCHAR   | ICD10                                                                                            | CL936147                     | ICD10, 2016                                               |
| If yes alcoholism, please provide ICD10 code:                           | text        | VARCHAR   | ICD10                                                                                            | CL936147                     | ICD10, 2016                                               |
| If yes alcoholism, please provide ICD10 code:                           | text        | VARCHAR   | ICD10                                                                                            | CL936147                     | ICD10, 2016                                               |
| <b>Smoking History</b>                                                  |             |           |                                                                                                  |                              |                                                           |
| Has the participant ever smoked tobacco?                                | radio       | ENUMERATE | 1, Yes   0, No   98, Unknown                                                                     | C0543414                     | Tobacco use                                               |
| If yes, is the smoking ongoing?                                         | radio       | ENUMERATE | 1, Yes   0, No   98, Unknown                                                                     | C3853727                     | Tobacco user                                              |
| Duration of smoking (current/past):                                     | text        | INT       | NA                                                                                               | C0543414; C0449238           | Tobacco use; Duration (temporal concept)                  |
| Duration unit:                                                          | radio       | ENUMERATE | 1, Months   2, Years                                                                             | C1519384; C0449238           | Tobacco Smoking History; Duration (temporal concept)      |
| Has participant quit smoking?                                           | radio       | ENUMERATE | 1, Yes   0, No   98, Unknown                                                                     | C1698618                     | Ex-tobacco user                                           |
| How long since quitting?                                                | text        | INT       | NA                                                                                               | C1698618; C1707889           | Ex-tobacco user; Elapse                                   |
| Duration unit:                                                          | radio       | ENUMERATE | 1, Months   2, Years                                                                             | C1519384; C0449238           | Tobacco Smoking History; Duration (temporal concept)      |
| <b>Tuberculosis History</b>                                             |             |           |                                                                                                  |                              |                                                           |
| Any previous TB episodes?                                               | radio       | ENUMERATE | 1, Yes   0, No   2, Unknown                                                                      | C0041296; C3258978           | Tuberculosis; Medical History                             |
| Year of last TB episode?                                                | text        | VARCHAR   | NA                                                                                               | C0041296; C3258978           | Tuberculosis; Medical History                             |
| Number of previously treated TB episodes:                               | text        | VARCHAR   | NA                                                                                               | C0041296; C3258978           | Tuberculosis; Medical History                             |
| Was one of those previous episodes DRTB?                                | radio       | ENUMERATE | 1, Yes   0, No   98, Unknown                                                                     | C0041296; C3258978           | Tuberculosis; Medical History                             |
| When was most recent TB treatment completed?                            | radio       | ENUMERATE | 1, One year ago   2, >= one year ago                                                             | C0040223                     | Time, temporal concept                                    |
| History of BCG vaccination                                              | radio       | ENUMERATE | 1, Yes   0, No   98, Unknown                                                                     | C3257574; C3258978           | BCG Vaccine; Medical History                              |
| Does the participant report any of the following symptoms listed below? | yesno       | BOOLEAN   | NA                                                                                               | C3258978                     | Medical History                                           |
| Night sweats                                                            | radio       | ENUMERATE | 1, Less than one week   2, At least 1 week and less than 2 weeks   3, At least 2 weeks   0, None | C0028081; C3258978; C0449238 | Night sweats; Medical History; Duration, temporal concept |
| Fevers                                                                  | radio       | ENUMERATE | 1, Less than one week   2, At least 1 week and less than 2 weeks   3, At least 2 weeks   0, None | C0015967; C3258978; C0449238 | Fevers; Medical History; Duration, temporal concept       |

| Variable                                                                                                      | REDCap Type | SQL Type  | Enumeration                                                                                      | CUI                          | CUI Name                                                                    |
|---------------------------------------------------------------------------------------------------------------|-------------|-----------|--------------------------------------------------------------------------------------------------|------------------------------|-----------------------------------------------------------------------------|
| Loss of appetite                                                                                              | radio       | ENUMERATE | 1, Less than one week   2, At least 1 week and less than 2 weeks   3, At least 2 weeks   0, None | C0232462; C3258978; C0449238 | Decrease in appetite; Medical History; Duration, temporal concept           |
| Unintentional Weight loss                                                                                     | radio       | ENUMERATE | 1, Less than one week   2, At least 1 week and less than 2 weeks   3, At least 2 weeks   0, None | C0936227; C3258978; C0449238 | Abnormal weight loss (finding); Medical History; Duration, temporal concept |
| Malaise/fatigue                                                                                               | radio       | ENUMERATE | 1, Less than one week   2, At least 1 week and less than 2 weeks   3, At least 2 weeks   0, None | C0024528; C3258978; C0449238 | Malaise and fatigue; Medical History; Duration, temporal concept            |
| Cough                                                                                                         | radio       | ENUMERATE | 1, Less than one week   2, At least 1 week and less than 2 weeks   3, At least 2 weeks   0, None | C3258978; C0449238           | Medical History; Duration, temporal concept                                 |
| Sputum production                                                                                             | radio       | ENUMERATE | 1, Less than one week   2, At least 1 week and less than 2 weeks   3, At least 2 weeks   0, None | C3258978; C0449238           | Medical History; Duration, temporal concept                                 |
| Haemoptysis                                                                                                   | radio       | ENUMERATE | 1, Less than one week   2, At least 1 week and less than 2 weeks   3, At least 2 weeks   0, None | C3258978; C0449238           | Medical History; Duration, temporal concept                                 |
| Dyspnoea                                                                                                      | radio       | ENUMERATE | 1, Less than one week   2, At least 1 week and less than 2 weeks   3, At least 2 weeks   0, None | C3258978; C0449238           | Medical History; Duration, temporal concept                                 |
| Pleuritic chest pain                                                                                          | radio       | ENUMERATE | 1, Less than one week   2, At least 1 week and less than 2 weeks   3, At least 2 weeks   0, None | C3258978; C0449238           | Medical History; Duration, temporal concept                                 |
| Abdominal pain                                                                                                | radio       | ENUMERATE | 1, Less than one week   2, At least 1 week and less than 2 weeks   3, At least 2 weeks   0, None | C3258978; C0449238           | Medical History; Duration, temporal concept                                 |
| Nausea                                                                                                        | radio       | ENUMERATE | 1, Less than one week   2, At least 1 week and less than 2 weeks   3, At least 2 weeks   0, None | C3258978; C0449238           | Medical History; Duration, temporal concept                                 |
| Vomiting                                                                                                      | radio       | ENUMERATE | 1, Less than one week   2, At least 1 week and less than 2 weeks   3, At least 2 weeks   0, None | C3258978; C0449238           | Medical History; Duration, temporal concept                                 |
| <b>Medications History</b>                                                                                    |             |           |                                                                                                  |                              |                                                                             |
| Is the participant currently on medication? If yes, please continue with name of drug,dose etc.               | yesno       | BOOLEAN   | NA                                                                                               | CL972932                     | History of medication                                                       |
| Has the participant taken any medication in past 8 weeks? If yes, please continue with name of drug,dose etc. | yesno       | BOOLEAN   | NA                                                                                               | CL972932                     | History of medication                                                       |
| Drug name #1:                                                                                                 | text        | VARCHAR   | NA                                                                                               | NULL                         | Translate to RxNorm post facto                                              |
| Drug name #2:                                                                                                 | text        | VARCHAR   | NA                                                                                               | NULL                         | Translate to RxNorm post facto                                              |
| Drug name #3:                                                                                                 | text        | VARCHAR   | NA                                                                                               | NULL                         | Translate to RxNorm post facto                                              |
| Drug name #4:                                                                                                 | text        | VARCHAR   | NA                                                                                               | NULL                         | Translate to RxNorm post facto                                              |

| Variable                               | REDCap Type | SQL Type  | Enumeration                                 | CUI                | CUI Name                                       |
|----------------------------------------|-------------|-----------|---------------------------------------------|--------------------|------------------------------------------------|
| Drug name #5:                          | text        | VARCHAR   | NA                                          | NULL               | Translate to RxNorm post facto                 |
| Drug name #6:                          | text        | VARCHAR   | NA                                          | NULL               | Translate to RxNorm post facto                 |
| Drug name #1:                          | text        | VARCHAR   | NA                                          | NULL               | Translate to RxNorm post facto                 |
| Drug name #2:                          | text        | VARCHAR   | NA                                          | NULL               | Translate to RxNorm post facto                 |
| Drug name #3:                          | text        | VARCHAR   | NA                                          | NULL               | Translate to RxNorm post facto                 |
| Drug name #4:                          | text        | VARCHAR   | NA                                          | NULL               | Translate to RxNorm post facto                 |
| Drug name #5:                          | text        | VARCHAR   | NA                                          | NULL               | Translate to RxNorm post facto                 |
| Drug name #6:                          | text        | VARCHAR   | NA                                          | NULL               | Translate to RxNorm post facto                 |
| <b>PET/Bronchoscopy Physical</b>       |             |           |                                             |                    |                                                |
| CD4 cell count result done & available | radio       | ENUMERATE | 1, Yes   0, No   99, N/A                    | CL523893           | CD4 Count determination procedure              |
| CD4 cell count [cells/mm3]             | text        | INT       | NA                                          | C3541261           | CD4 Expressing Cell Count                      |
| HIV viral load result done & available | radio       | ENUMERATE | 1, Yes   0, No   99, N/A                    | C1168369           | HIV Viral Load Measurement                     |
| HIV viral load [copies/ml]             | text        | INT       | NA                                          | C1168369; C0456984 | HIV Viral Load Measurement; Test Result        |
| HIV ELISA test result                  | radio       | ENUMERATE | 0, Negative   1, Positive   98, Not Done    | C0201388; C0456984 | HIV-1 ELISA assay; Test Result                 |
| Weight (kg)                            | text        | INT       | NA                                          | C0005910; C0031809 | Body Weight; Physical Examination              |
| Height (cm)                            | text        | INT       | NA                                          | C0489786; C0031809 | Body Height; Physical Examination              |
| Blood Pressure: systolic               | text        | INT       | NA                                          | C0871470; C0031809 | Systolic Blood Pressure; Physical Examination  |
| Repeat Blood Pressure: systolic        | text        | INT       | NA                                          | C0871470; C0031809 | Systolic Blood Pressure; Physical Examination  |
| Blood Pressure: diastolic              | text        | INT       | NA                                          | C0428883; C0031809 | Diastolic Blood Pressure; Physical Examination |
| Repeat Blood Pressure: diastolic       | text        | INT       | NA                                          | C0428883; C0031809 | Diastolic Blood Pressure; Physical Examination |
| Temperature (?C)                       | text        | DOUBLE    | NA                                          | C0005903; C0031809 | Body Temperature; Physical Examination         |
| Pulse Rate                             | text        | INT       | NA                                          | C0232117; C0031809 | Pulse Rate; Physical Examination               |
| Respiratory rate/min                   | text        | INT       | NA                                          | C0231832           | Respiratory Rate                               |
| Hb [g/dL]                              | text        | DOUBLE    | NA                                          | C1984226           | Hemoglobin test status                         |
| Random HGT [mmol/L]                    | text        | DOUBLE    | NA                                          | C0428567           | Random blood glucose measurement               |
| HbA1c result                           | text        | DOUBLE    | NA                                          | C0474680           | Hemoglobin A1c measurement                     |
| <b>Chest X-Ray</b>                     |             |           |                                             |                    |                                                |
| Film quality?                          | radio       | ENUMERATE | 1, Optimal   2, Sub-optimal   3, Unreadable | C0806487           | Image Quality                                  |
| Infiltrate or Consolidation            | checkbox    | ENUMERATE | 1, Infiltrate or Consolidation              | NULL               |                                                |
| Any cavity lesion                      | checkbox    | ENUMERATE | 2, Any cavity lesion                        | NULL               |                                                |
| Nodule with poorly defined margins     | checkbox    | ENUMERATE | 3, Nodule with poorly defined margins       | NULL               |                                                |

| Variable                                                                                                                                                   | REDCap Type | SQL Type  | Enumeration                                          | CUI                                | CUI Name                                                                                                                                                                          |
|------------------------------------------------------------------------------------------------------------------------------------------------------------|-------------|-----------|------------------------------------------------------|------------------------------------|-----------------------------------------------------------------------------------------------------------------------------------------------------------------------------------|
| Pleural effusion                                                                                                                                           | checkbox    | ENUMERATE | 4, Pleural effusion                                  | NULL                               |                                                                                                                                                                                   |
| Hilar or Mediastinal Lymphadenopathy                                                                                                                       | checkbox    | ENUMERATE | 5, Hilar or Mediastinal Lymphadenopathy              | NULL                               |                                                                                                                                                                                   |
| Other findings suggestive of TB e.g. millitary TB                                                                                                          | checkbox    | ENUMERATE | 6, Other findings suggestive of TB e.g. millitary TB | NULL                               |                                                                                                                                                                                   |
| Right Upper Lobe                                                                                                                                           | checkbox    | ENUMERATE | 1, Right Upper Lobe                                  | C1261074                           | Upper lobe of the right lung                                                                                                                                                      |
| Right Middle Lobe                                                                                                                                          | checkbox    | ENUMERATE | 2, Right Middle Lobe                                 | C0225757                           | Middle lobe of the right lung                                                                                                                                                     |
| Right Lower Lobe                                                                                                                                           | checkbox    | ENUMERATE | 3, Right Lower Lobe                                  | C1261075                           | Lower lobe of the right lung                                                                                                                                                      |
| Left Upper Lobe                                                                                                                                            | checkbox    | ENUMERATE | 4, Left Upper Lobe                                   | C1261076                           | Upper lobe of left lung                                                                                                                                                           |
| Left Lower Lobe                                                                                                                                            | checkbox    | ENUMERATE | 5, Left Lower Lobe                                   | C1261077                           | Lower lobe of left lung                                                                                                                                                           |
| Modified Ralph score:                                                                                                                                      | text        | DOUBLE    | NA                                                   | NULL                               |                                                                                                                                                                                   |
| <b>Inclusion Criteria</b>                                                                                                                                  |             |           |                                                      |                                    |                                                                                                                                                                                   |
| Age 18 -65 years                                                                                                                                           | radio       | ENUMERATE | 1, Yes   0, No   99, Not Applicable                  | C1704756; C0001779                 | Trial Inclusion and Exclusion Criteria Domain; Age                                                                                                                                |
| Weight >35kg and < 120kg                                                                                                                                   | radio       | ENUMERATE | 1, Yes   0, No   99, Not Applicable                  | C1704756; C0005910                 | Trial Inclusion and Exclusion Criteria Domain; Body Weight                                                                                                                        |
| Absence of current source of infection                                                                                                                     | radio       | ENUMERATE | 1, Yes   0, No   99, Not Applicable                  | C1704756; C3714514                 | Trial Inclusion and Exclusion Criteria Domain; Infection                                                                                                                          |
| HIV negative                                                                                                                                               | radio       | ENUMERATE | 1, Yes   0, No   99, Not Applicable                  | C1704756; C0458074                 | Trial Inclusion and Exclusion Criteria Domain; HIV status                                                                                                                         |
| Newly diagnosed, recurrent TB with previous TB treatment completed at least 36 months prior to recruitment.                                                | radio       | ENUMERATE | 1, Yes   0, No   99, Not applicable                  | C1704756; C0857427                 | Trial Inclusion and Exclusion Criteria Domain; Old Tuberculosis                                                                                                                   |
| Rifampicin sensitivity confirmed by Gene Xpert                                                                                                             | radio       | ENUMERATE | 1, Yes   0, No   99, Not applicable                  | C1704756; C0035608; C0025948       | Trial Inclusion and Exclusion Criteria Domain; Rifampin; Microbial Sensitivity Test                                                                                               |
| No TB in past 3 years (this 3 years start when the tx is done)                                                                                             | radio       | ENUMERATE | 1, Yes   0, No   99, Not applicable                  | C1704756; C0857427                 | Trial Inclusion and Exclusion Criteria Domain; Old Tuberculosis                                                                                                                   |
| They are smear positive OR Xpert positive (medium/high or very high) OR Xpert positive lower than medium with either symptoms or CXR positive or active TB | radio       | ENUMERATE | 1, Yes   0, No   99, Not applicable                  | ICD10-A15.0; ICD10-A15.3; C0039985 | Tuberculosis of lung, confirmed by sputum microscopy with or without culture;                                                                                                     |
| Absent history of TB or known exposure to a TB patient                                                                                                     | radio       | ENUMERATE | 1, Yes   0, No   99, Not applicable                  | C1704756; C0857427; C1708498       | Trial Inclusion and Exclusion Criteria Domain; Old Tuberculosis; Indirect Contact Transmission Infection; Tuberculosis of lung, confirmed by unspecified means; Chest Radiography |
| HIV negative                                                                                                                                               | radio       | ENUMERATE | 1, Yes   0, No   99, Not applicable                  | C1704756; C0458074                 | Trial Inclusion and Exclusion Criteria Domain; HIV status                                                                                                                         |
| No TB for 3 years (This 3 yrs start when the treatment is done)                                                                                            | radio       | ENUMERATE | 1, Yes   0, No   99, Not applicable                  | C1704756; C0857427                 | Trial Inclusion and Exclusion Criteria Domain; Old Tuberculosis                                                                                                                   |
| Xpert negative                                                                                                                                             | radio       | ENUMERATE | 1, Yes   0, No   99, Not applicable                  | C0587081                           | Laboratory Test Result                                                                                                                                                            |
| No symptoms/CXR signs                                                                                                                                      | radio       | ENUMERATE | 1, Yes   0, No   99, Not applicable                  | C0039985                           | Chest Radiography                                                                                                                                                                 |
| No known contact for past 1 yr                                                                                                                             | radio       | ENUMERATE | 1, Yes   0, No   99, Not applicable                  | NULL                               |                                                                                                                                                                                   |

| Variable                                                                | REDCap Type | SQL Type  | Enumeration                                                                                                                                                    | CUI                                              | CUI Name                                                                                                                                    |
|-------------------------------------------------------------------------|-------------|-----------|----------------------------------------------------------------------------------------------------------------------------------------------------------------|--------------------------------------------------|---------------------------------------------------------------------------------------------------------------------------------------------|
| <b>Study Arm</b>                                                        |             |           |                                                                                                                                                                |                                                  |                                                                                                                                             |
| Assigned to Arm 3: Comm. CtIs (HN)                                      | yesno       | BOOLEAN   | NA                                                                                                                                                             | NULL                                             |                                                                                                                                             |
| Assigned to Arm 2: TB Cases (HN)                                        | yesno       | BOOLEAN   | NA                                                                                                                                                             | NULL                                             |                                                                                                                                             |
| Assigned to Arm 4: Close Contacts (HN)                                  | yesno       | BOOLEAN   | NA                                                                                                                                                             | NULL                                             |                                                                                                                                             |
| Assigned to Arm 5: HIV Positive                                         | yesno       | BOOLEAN   | NA                                                                                                                                                             | NULL                                             |                                                                                                                                             |
| <b>Laboratory GeneXpert</b>                                             |             |           |                                                                                                                                                                |                                                  |                                                                                                                                             |
| From where was the sputum collected that yielded this GeneXpert result? | radio       | ENUMERATE | 1, Research sputum collection   2, Routine clinical care at treating facility   3, No GeneXpert was done                                                       | NULL                                             |                                                                                                                                             |
| GeneXpert date done?                                                    | text        | DATE      | NA                                                                                                                                                             | C0011008                                         | Date, temporal concept                                                                                                                      |
| Positive result found?                                                  | radio       | ENUMERATE | 1, Yes   0, No   99, Result not available                                                                                                                      | C0587081                                         | Laboratory Test Result                                                                                                                      |
| Rif resistance found?                                                   | radio       | ENUMERATE | 1, Yes   0, No   99, Result not available                                                                                                                      | C0035608; C0025948                               | Rifampin; Microbial Sensitivity Test                                                                                                        |
| Xpert ranking?                                                          | radio       | ENUMERATE | 1, Very low   2, Low   3, Medium   4, High   5, Very high   99, Not available                                                                                  | NULL                                             |                                                                                                                                             |
| Where was this repeat done?                                             | radio       | ENUMERATE | 1, Research lab   2, Reference lab   3, No GeneXpert repeat was done                                                                                           | NULL                                             |                                                                                                                                             |
| GeneXpert date done?                                                    | text        | DATE      | NA                                                                                                                                                             | C0011008                                         | Date, temporal concept                                                                                                                      |
| Positive result found?                                                  | radio       | ENUMERATE | 1, Yes   0, No   99, Result not available                                                                                                                      | C0587081                                         | Laboratory Test Result                                                                                                                      |
| Rif resistance found?                                                   | radio       | ENUMERATE | 1, Yes   0, No   99, Result not available                                                                                                                      | C0035608; C0025948                               | Rifampin; Microbial Sensitivity Test                                                                                                        |
| Xpert ranking?                                                          | radio       | ENUMERATE | 1, Very low   2, Low   3, Medium   4, High   5, Very high   99, Not available                                                                                  | NULL                                             |                                                                                                                                             |
| <b>PET Result</b>                                                       |             |           |                                                                                                                                                                |                                                  |                                                                                                                                             |
| Visible lesions on CT:                                                  | yesno       | BOOLEAN   | NA                                                                                                                                                             | C0202823                                         | Chest CT                                                                                                                                    |
| If yes, how many?                                                       | dropdown    | ENUMERATE | 1, 1   2, 2   3, 3   4, 4                                                                                                                                      | NULL                                             |                                                                                                                                             |
| Is the lesion in keeping with TB lesion?                                | yesno       | BOOLEAN   | NA                                                                                                                                                             | NULL                                             |                                                                                                                                             |
| Main location of lesions:                                               | radio       | ENUMERATE | 1, LUL   2, RUL   3, RML   4, LLL   5, RLL                                                                                                                     | C1261076; C1261074; C0225757; C1261077; C1261075 | Upper lobe of left lung; Upper lobe of the right lung; Middle lobe of the right lung; Lower lobe of left lung; Lower lobe of the right lung |
| Morphology of lesions:                                                  | dropdown    | ENUMERATE | 1, Enlarged lymphnode   2, Nodule   3, Consolidation   4, Cavity   5, Tree-in-bud   6, Bronchial thickening   7, Linear scar   8, Fibrosis   9, Bronchiectasis | NULL                                             |                                                                                                                                             |

| Variable                                    | REDCap Type | SQL Type  | Enumeration                                                                                                                                                                                                         | CUI                                              | CUI Name                                                                                                                                    |
|---------------------------------------------|-------------|-----------|---------------------------------------------------------------------------------------------------------------------------------------------------------------------------------------------------------------------|--------------------------------------------------|---------------------------------------------------------------------------------------------------------------------------------------------|
|                                             |             |           | (ground-glass)   10, Mass   11, Bulla(e)   12, Other                                                                                                                                                                |                                                  |                                                                                                                                             |
| If other, comment                           | text        | VARCHAR   | NA                                                                                                                                                                                                                  | NULL                                             |                                                                                                                                             |
| Does the lesion have increased FDG-avidity? | yesno       | BOOLEAN   | NA                                                                                                                                                                                                                  | NULL                                             |                                                                                                                                             |
| If yes, SUVmax:                             | text        | DOUBLE    | NA                                                                                                                                                                                                                  | NULL                                             |                                                                                                                                             |
| If yes, metabolic lesion volume:            | text        | DOUBLE    | NA                                                                                                                                                                                                                  | NULL                                             |                                                                                                                                             |
| If yes, total glycolytic activity:          | text        | DOUBLE    | NA                                                                                                                                                                                                                  | NULL                                             |                                                                                                                                             |
| Is the lesion in keeping with TB lesion?    | yesno       | BOOLEAN   | NA                                                                                                                                                                                                                  | NULL                                             |                                                                                                                                             |
| Main location of lesions:                   | radio       | ENUMERATE | 1, LUL   2, RUL   3, RML   4, LLL   5, RLL                                                                                                                                                                          | C1261076; C1261074; C0225757; C1261077; C1261075 | Upper lobe of left lung; Upper lobe of the right lung; Middle lobe of the right lung; Lower lobe of left lung; Lower lobe of the right lung |
| Morphology of lesions:                      | dropdown    | ENUMERATE | 1, Enlarged lymphnode   2, Nodule   3, Consolidation   4, Cavity   5, Tree-in-bud   6, Bronchial thickening   7, Linear scar   8, Fibrosis   9, Bronchiectasis (ground-glass)   10, Mass   11, Bulla(e)   12, Other | NULL                                             |                                                                                                                                             |
| If other, comment                           | text        | VARCHAR   | NA                                                                                                                                                                                                                  | NULL                                             |                                                                                                                                             |
| Does the lesion have increased FDG-avidity? | yesno       | BOOLEAN   | NA                                                                                                                                                                                                                  | NULL                                             |                                                                                                                                             |
| If yes, SUVmax:                             | text        | DOUBLE    | NA                                                                                                                                                                                                                  | NULL                                             |                                                                                                                                             |
| If yes, metabolic lesion volume:            | text        | DOUBLE    | NA                                                                                                                                                                                                                  | NULL                                             |                                                                                                                                             |
| If yes, total glycolytic activity:          | text        | DOUBLE    | NA                                                                                                                                                                                                                  | NULL                                             |                                                                                                                                             |
| Is the lesion in keeping with TB lesion?    | yesno       | BOOLEAN   | NA                                                                                                                                                                                                                  | NULL                                             |                                                                                                                                             |
| Main location of lesions:                   | radio       | ENUMERATE | 1, LUL   2, RUL   3, RML   4, LLL   5, RLL                                                                                                                                                                          | C1261076; C1261074; C0225757; C1261077; C1261075 | Upper lobe of left lung; Upper lobe of the right lung; Middle lobe of the right lung; Lower lobe of left lung; Lower lobe of the right lung |
| Morphology of lesions:                      | dropdown    | ENUMERATE | 1, Enlarged lymphnode   2, Nodule   3, Consolidation   4, Cavity   5, Tree-in-bud   6, Bronchial thickening   7, Linear scar   8, Fibrosis   9, Bronchiectasis (ground-glass)   10, Mass   11, Bulla(e)   12, Other | NULL                                             |                                                                                                                                             |
| If other, comment                           | text        | VARCHAR   | NA                                                                                                                                                                                                                  | NULL                                             |                                                                                                                                             |
| Does the lesion have increased FDG-avidity? | yesno       | BOOLEAN   | NA                                                                                                                                                                                                                  | NULL                                             |                                                                                                                                             |
| If yes, SUVmax:                             | text        | DOUBLE    | NA                                                                                                                                                                                                                  | NULL                                             |                                                                                                                                             |
| If yes, metabolic lesion volume (ml):       | text        | DOUBLE    | NA                                                                                                                                                                                                                  | NULL                                             |                                                                                                                                             |



| Variable                                               | REDCap Type | SQL Type  | Enumeration                                                                                                                                                                                                         | CUI                                              | CUI Name                                                                                                                                    |
|--------------------------------------------------------|-------------|-----------|---------------------------------------------------------------------------------------------------------------------------------------------------------------------------------------------------------------------|--------------------------------------------------|---------------------------------------------------------------------------------------------------------------------------------------------|
| If yes, total glycolytic activity:                     | text        | DOUBLE    | NA                                                                                                                                                                                                                  | NULL                                             |                                                                                                                                             |
| Is the lesion in keeping with TB lesion?               | yesno       | BOOLEAN   | NA                                                                                                                                                                                                                  | NULL                                             |                                                                                                                                             |
| Main location of lesions:                              | radio       | ENUMERATE | 1, LUL   2, RUL   3, RML   4, LLL   5, RLL                                                                                                                                                                          | C1261076; C1261074; C0225757; C1261077; C1261075 |                                                                                                                                             |
| Morphology of lesions:                                 | dropdown    | ENUMERATE | 1, Enlarged lymphnode   2, Nodule   3, Consolidation   4, Cavity   5, Tree-in-bud   6, Bronchial thickening   7, Linear scar   8, Fibrosis   9, Bronchiectasis (ground-glass)   10, Mass   11, Bulla(e)   12, Other | NULL                                             |                                                                                                                                             |
| If other, comment                                      | text        | VARCHAR   | NA                                                                                                                                                                                                                  | NULL                                             |                                                                                                                                             |
| Does the lesion have increased FDG-avidity?            | yesno       | BOOLEAN   | NA                                                                                                                                                                                                                  | NULL                                             |                                                                                                                                             |
| If yes, SUVmax:                                        | text        | DOUBLE    | NA                                                                                                                                                                                                                  | NULL                                             |                                                                                                                                             |
| If yes, metabolic lesion volume:                       | text        | DOUBLE    | NA                                                                                                                                                                                                                  | NULL                                             |                                                                                                                                             |
| If yes, total glycolytic activity:                     | text        | DOUBLE    | NA                                                                                                                                                                                                                  | NULL                                             |                                                                                                                                             |
| <b>Laboratory BAL</b>                                  |             |           |                                                                                                                                                                                                                     |                                                  |                                                                                                                                             |
| Date BAL sample taken:                                 | text        | DATE      | NA                                                                                                                                                                                                                  | C0011008                                         | Date, temporal concept                                                                                                                      |
| Lobe                                                   | text        | CHAR      | NA                                                                                                                                                                                                                  | C1261076; C1261074; C0225757; C1261077; C1261075 | Upper lobe of left lung; Upper lobe of the right lung; Middle lobe of the right lung; Lower lobe of left lung; Lower lobe of the right lung |
| <b>Laboratory Quantiferon</b>                          |             |           |                                                                                                                                                                                                                     |                                                  |                                                                                                                                             |
| QFN GOLD PLUS result?                                  | radio       | ENUMERATE | 1, Positive   0, Negative   2, Indeterminate   3, Borderline   98, Not tested                                                                                                                                       | C0587081                                         | Laboratory Test Result                                                                                                                      |
| QFN Nil OD value [IU/ml] {cut-off = < 0.2}             | text        | DOUBLE    | NA                                                                                                                                                                                                                  | C0587081                                         | Laboratory Test Result                                                                                                                      |
| QFN TB1 OD value [IU/ml] {cut-off = 0.2 - 0.7}         | text        | DOUBLE    | NA                                                                                                                                                                                                                  | C0587081                                         | Laboratory Test Result                                                                                                                      |
| QFN TB2 OD value [IU/ml] {cut-off = 0.2 - 0.7}         | text        | DOUBLE    | NA                                                                                                                                                                                                                  | C0587081                                         | Laboratory Test Result                                                                                                                      |
| QFN Mitogen OD value [IU/ml] {cut-off = >0.7}          | text        | DOUBLE    | NA                                                                                                                                                                                                                  | C0587081                                         | Laboratory Test Result                                                                                                                      |
| QFN TB1 - Nil OD value [IU/ml]                         | text        | DOUBLE    | NA                                                                                                                                                                                                                  | C0587081                                         | Laboratory Test Result                                                                                                                      |
| QFN TB2 - Nil OD value [IU/ml]                         | text        | DOUBLE    | NA                                                                                                                                                                                                                  | C0587081                                         | Laboratory Test Result                                                                                                                      |
| QFN Mitogen - Nil OD value [IU/ml]                     | text        | DOUBLE    | NA                                                                                                                                                                                                                  | C0587081                                         | Laboratory Test Result                                                                                                                      |
| Date QFN ELISA done                                    | text        | DATE      | NA                                                                                                                                                                                                                  | C0011008                                         | Date, temporal concept                                                                                                                      |
| <b>Laboratory Sputum</b>                               |             |           |                                                                                                                                                                                                                     |                                                  |                                                                                                                                             |
| Where is the smear result 1 for this participant from? | radio       | ENUMERATE | 1, Research smear   2, Routine clinical care at treating facility   3, Not Done                                                                                                                                     | NULL                                             |                                                                                                                                             |

| Variable                                               | REDCap Type | SQL Type  | Enumeration                                                                                                                                                                                                              | CUI                | CUI Name                                                                                                      |
|--------------------------------------------------------|-------------|-----------|--------------------------------------------------------------------------------------------------------------------------------------------------------------------------------------------------------------------------|--------------------|---------------------------------------------------------------------------------------------------------------|
| Smear1 specimen collection date?                       | text        | DATE      | NA                                                                                                                                                                                                                       | C0011008           | Date, temporal concept                                                                                        |
| Smear1 results as pos/neg                              | radio       | ENUMERATE | 1, Positive   0, Negative   89, Data not known   99, Not tested                                                                                                                                                          | NULL               |                                                                                                               |
| Smear1 result as score?                                | radio       | ENUMERATE | 0, Negative   1, 1+ = less than 1 AFB per field   2, 2+ = 1 to 10 AFB per field   3, 3+ = more than 10 AFB per field   4, Less than 10 AFB per all fields   89, Not available   99, Not tested                           | C0587081; C0152616 | Laboratory Test Result; Pulmonary tuberculosis, unspecified, tubercle bacilli found (in sputum) by microscopy |
| Where is the smear result 2 for this participant from? | radio       | ENUMERATE | 1, Research smear   2, Routine clinical care at treating facility   3, Not Done                                                                                                                                          | NULL               |                                                                                                               |
| Smear2 specimen collection date?                       | text        | DATE      | NA                                                                                                                                                                                                                       | C0011008           | Date, temporal concept                                                                                        |
| Smear2 results as pos/neg                              | radio       | ENUMERATE | 1, Positive   0, Negative   89, Data not known   99, Not tested                                                                                                                                                          | C0587081; C0152616 | Laboratory Test Result; Pulmonary tuberculosis, unspecified, tubercle bacilli found (in sputum) by microscopy |
| Smear2 as score?                                       | radio       | ENUMERATE | 0, Negative   1, 1+ = less than 1 AFB per field   2, 2+ = 1 to 10 AFB per field   3, 3+ = more than 10 AFB per field   4, Less than 10 AFB per all fields   89, Not available   99, Not tested                           | NULL               |                                                                                                               |
| <b>Laboratory Culture</b>                              |             |           |                                                                                                                                                                                                                          |                    |                                                                                                               |
| Liquid culture result?                                 | radio       | ENUMERATE | 1, Positive   0, Negative   2, Contaminated   89, Data not known   99, Not tested                                                                                                                                        | C0587081           | Laboratory Test Result                                                                                        |
| Date positive?                                         | text        | DATE      | NA                                                                                                                                                                                                                       | C0011008           | Date, temporal concept                                                                                        |
| If positive or contaminated, time to positive?         | text        | INT       | NA                                                                                                                                                                                                                       | C0587081;          | Laboratory Test Result;                                                                                       |
| Time to positive units?                                | radio       | ENUMERATE | 1, Hours   2, Days                                                                                                                                                                                                       | C0449238           | Duration, temporal concept                                                                                    |
| Liquid culture Mycobacterium speciation?               | dropdown    | ENUMERATE | 1, M. tuberculosis   2, M. bovis   3, M. avium   4, M. intracellulare   6, M. kansasii   7, M. fortuitum   8, M. asiaticum   9, Mtb Complex   30, MOTT, other   60, Myco spp unknown   90, Not detected   99, Not tested | C0587081           | Laboratory Test Result                                                                                        |
| Speciation method?                                     | radio       | ENUMERATE | 1, Capilia   2, PCR                                                                                                                                                                                                      | C0587081           | Laboratory Test Result                                                                                        |
| ZN of MGIT culture Result1?                            | radio       | ENUMERATE | 0, Negative   1, Negative (contaminated)   2, Positive   3, Positive (contaminated)   99, Not Done                                                                                                                       | C0587081           | Laboratory Test Result                                                                                        |

| Variable                                                     | REDCap Type | SQL Type  | Enumeration                                                                                                                                                                                                                    | CUI                | CUI Name                                                                                          |
|--------------------------------------------------------------|-------------|-----------|--------------------------------------------------------------------------------------------------------------------------------------------------------------------------------------------------------------------------------|--------------------|---------------------------------------------------------------------------------------------------|
| Blood Agar Result1?                                          | radio       | ENUMERATE | 0, No growth   1, Growth (contaminants)   99, Not Done                                                                                                                                                                         | C0587081           | Laboratory Test Result                                                                            |
| Mycobacterium Selectatab                                     | radio       | ENUMERATE | 0, No growth   1, Growth   2, Contaminated   98, Not Done                                                                                                                                                                      | C0587081           | Laboratory Test Result                                                                            |
| ZN of Selectatab                                             | radio       | ENUMERATE | 0, Negative   1, Negative (contaminated)   2, Positive   3, Positive (contaminated)   99, Not Done                                                                                                                             | C0587081           | Laboratory Test Result                                                                            |
| <b>Study Arm</b>                                             |             |           |                                                                                                                                                                                                                                |                    |                                                                                                   |
| Participant qualifies for the following group:               | radio       | ENUMERATE | 1, Group 4 - Resister (n = 20)   2, Group 5 - Converter (n = 20)   3, Group 6, Reverter (n = 20)   4, Group 7, IGRA pos, PET neg Adaptive Immune Control (n = 20)   5, Group 8, IGRA pos, PET pos Subclinical disease (n = 20) | NULL               |                                                                                                   |
| Participant qualifies for the following group:               | radio       | ENUMERATE | 1, Group 2 - IGRA neg Community Control (n=20)   2, Group 3 - IGRA pos Community Control (n=20)                                                                                                                                | NULL               |                                                                                                   |
| PTB confirmed?                                               | yesno       | BOOLEAN   | NA                                                                                                                                                                                                                             | C1407689           | Primary respiratory tuberculosis                                                                  |
| If yes: select all applicable (choice=GeneXpert positive)    | checkbox    | ENUMERATE | 1, GeneXpert positive                                                                                                                                                                                                          | C1407689; C1880302 | Primary respiratory tuberculosis; Diagnostic Laboratory Biomarker Analysis                        |
| If yes: select all applicable (choice=Smear positive)        | checkbox    | ENUMERATE | 2, Smear positive                                                                                                                                                                                                              | C0152548           | Primary tuberculous infection, unspecified type, tubercle bacilli found (in sputum) by microscopy |
| If yes: select all applicable (choice=Culture positive)      | checkbox    | ENUMERATE | 3, Culture positive                                                                                                                                                                                                            | C0858489           | Primary tuberculous infection, unspecified type, confirmed by bacterial culture                   |
| If yes: select all applicable (choice=CXR suggest active TB) | checkbox    | ENUMERATE | 4, CXR suggest active TB                                                                                                                                                                                                       | C1407689; C0039985 | Primary respiratory tuberculosis; Chest Radiography                                               |
